# Supplementary material
Source: PubMed Central journal article supplement (PMC9128694)
Supplement: tpmd210699.SD1.pdf [file tpmd210699.SD1.pdf]

**Supplementary Table 1. Logistic regression analysis of baseline caregiver diarrheal disease awareness and five hour-structured observation of handwashing practices at the 6 month-follow-up by quartile (N=170)**

| <b>Outcomes of Interest</b>                                         | <b>Primary Caregivers<br/>OR (95% CI)</b> | <b>Quartile Knowledge<br/>Score Range</b> | <b>% Participants<br/>handwashing with<br/>soap</b> |
|---------------------------------------------------------------------|-------------------------------------------|-------------------------------------------|-----------------------------------------------------|
| Handwashing with soap at key events during structured observation   |                                           |                                           |                                                     |
| Q1 (Reference)                                                      | -                                         | 0-2                                       | 9%                                                  |
| Q2                                                                  | 1.66 (0.50, 5.49)                         | 3                                         | 15%                                                 |
| Q3                                                                  | 1.26 (0.31, 5.12)                         | 4                                         | 12%                                                 |
| Q4                                                                  | 2.41 (0.71, 8.16)                         | 5-9                                       | 20%                                                 |
| Handwashing with soap at food events during structured observation  |                                           |                                           |                                                     |
| Q1 (Reference)                                                      | -                                         | 0-2                                       | 4%                                                  |
| Q2                                                                  | 2.92 (0.55, 15.41)                        | 3                                         | 11%                                                 |
| Q3                                                                  | 3.48 (0.65, 18.51)                        | 4                                         | 13%                                                 |
| Q4                                                                  | <b>7.16 (1.56, 32.91)</b>                 | 5-7                                       | 23%                                                 |
| Handwashing with soap at stool events during structured observation |                                           |                                           |                                                     |
| Q1 (Reference)                                                      | -                                         | 0-2                                       | 13%                                                 |
| Q2                                                                  | 0.83 (0.14, 4.72)                         | 3                                         | 11%                                                 |
| Q3                                                                  | †                                         | 4                                         | 0%                                                  |
| Q4                                                                  | †                                         | 5-9                                       | 0%                                                  |

Q: Quartile OR: odds ratio; SD: standard error; CI: confidence interval; Bold face indicates statistical significance (P<0.05) † There are no handwashing events in quartiles 3 and 4.
